# Supplementary material for: Knowledge Retrieval from PubMed Abstracts and Electronic Medical Records with the Multiple Sclerosis Ontology
Source: PLoS One. 2015 Feb 9;10(2):e0116718. doi: 10.1371/journal.pone.0116718 (PMC4321837; doi:10.1371/journal.pone.0116718)
Supplement: S1 Table — (XLS) [file pone.0116718.s002.xls]

## Sheet: Dictionary MSO
English	UMLS CUI	Spanish	Catalan
1-(aminomethyl)cyclohexaneacetic acid	C0060926	gabapentina	gabapentina
1-39 ACTH	C0001655	Hormona Adrenocorticotropica, Corticotropina	Hormona Adrenocorticotròpica
1-Aminoadamantane	C0002403	Amantadina	Amantadina
12 Myristoyl 13 acetylphorbol	C0039654	Acetato de Miristato Forbol	Acetato de Miristato Forbol
2-Amino-6-(1,2,3-trihydroxypropyl)-4(3H)-pteridinone, Neopterin	C0068527	2-Amino-6-(1,2,3-trihidroxipropilo)-4(3H)-pteridinona, Neopterin	2-Amino-6-(1,2,3-trihidroxipropil-4(3H)-pteridinona, Neopterin
2-Pyrrolidone-N-Acetamide	C0031977	Piracetam	Piracetam
2'-Deoxy-2-chloroadenosine, Cladribina	C0092801	2-Cloro-2'-desoxiadenosina, Cladribina	2-Cloro-2'-desociadenosina, Cladribina
25 HCC Binding Protein	C0042872	Globulina de Union a Vitamina D	Globulina d'Unió a Vitamina D
3-(Aminomethyl)-5-methyl-hexanoic Acid	C0657912	pregabalina	pregabalina
3,4 Dihydroxyphenethylamine, Dopamine	C0013030	Dopamina	Dopamina
4 Aminopyridine	C0000477	4-Aminopiridina	4-Aminopiridina
4-Aminobutyric Acid	C0016904	Acido 4-Aminobutirico	àcid 4-aminobutíric
5 Hydroxytryptamine, Serotonine	C0036751	5 - hidroxi triptamina, Serotonina	5-Hidroxitiramina, Serotonina
5-Indolacetic acid 5-HIAA	C0020361	ácido 5-hidroxiindolacético	àcid 5-hidroxiindolacètic
6 Methylprednisolone	C0025815	Metilprednisolona	Metilprednisolona
Abductor muscle		Músculo abductor	Múscul abductor
Accessory Cell, Immunologic	C0003315	Celulas Inmunologicas Accesorias	cèl·lula accessòria
Acetamidophenol	C0000970	Acetaminofen	Acetamidofenol
Acetylcholine	C0001041	Acetilcolina	acetilcolina
Acid Synthase, Fatty	C0015683	Acido Graso Sintasa	àcid gras sintasa
Actin	C0001271	Actina-alfa	Actina-alfa
Action Potential	C0001272	Potenciales de Accion	Potencials d'Acció
Activation, Lymphocyte	C0024262	Activación de Linfocitos	Activació de limfòcits
Active Immunizations	C0205991	Inmunizacion Activa	Immunització Activa
Activity, Glomerular Procoagulant, CD142, tromboplastin	C0040048	tromboplastin CD142	tromboplastin CD142
Acupuncture		Acupuntura	Acupuntura
Acute		Agudo	Agut
Acute attack		Ataque agudo o Exacerbación o Recaída	Atac agut o Exacerbació o Recaiguda
Acute Disseminated Encephalomyelitides	C0014059	Encefalomielitis Aguda Diseminada	encefalomielitis disseminada aguda
Adaptive immunity	C0678209	Inmunidad Adaptativa	Immunitat adaptativa
Adductor muscle		Músculo aductor	Múscul aductor
Adipogenesis Inhibitory Factor, IL-11	C0083031	Factor Inhibidor de Adipogenesis, IL-11	Factor Inhibidor , Il-11
Adoptive Cellular Immunotherapies	C0079613	Inmunoterapia Celular Adoptiva	Immunoteràpia Cel·lular Adpotiva
Adoptive Transfer	C0376518	Transferencia pasica	Transferencia
adquired immunity	C0678209	inmunidad: adquirida	immunitat: adquirida
Adrenal Cortex Hormones	C0001617	hormonas adrenales	hormones adrenals
Adrenaline	C0014563	Adrenalina	Adrenalina
Adreno-corticotropin hormone ACTH (abbr.)		Hormona adrenocortico-trópica (ACTH)	Hormona adrenocortico-tròpica (ACTH)
Adult T Cell Leukemia Lymphoma Virus I, HTLV-I	C0020094	ATLV	ATLV
Afferent pupillary defect		Defecto puliplar aferente	Defecte aferent pupilar
Agents, Anticholinergic	C0242896	Agentes Anticolinergicos	agents anticolinèrgics
Agents, Antidepressive	C0003289	Agentes Antidepresivos	agents antidepressius
alemtuzumab	C0383429	alemtuzumab	alemtuzumab
Allergic Encephalomyelitis, Experimental	C0014072	Encefalomielitis Alergica	encefalomielitis al·lèrgica
alpha Interferon	C0002199	Interferon alfa	Interferó alfa
alpha2 HS glycoprotein	C0051477	glucoproteína alfa2 HS	glucoproteïna alfa2 HS
Alprazolam	C0002333	Alprazolam	Alprazolam
Alternative therapy and/or complementary		Terapia alternativa y/o complementaria	Teràpia alternativa y/o complementària
Amitriptyline	C0002600	Amitriptilina	Amitriptilina
Amnesia	C0002622	Amnesia	Amnèsia
Anionic Neutrophil Activating Peptide, Il-8	C0079633	Factor Quimiotactico Macrofago Derivado, IL-8	Factor Quimiotàctic Macròfag Derivat, IL-8
Ankle-foot orthosis AFO (abbr.)		Ortesis para el tobillo y el pie	Ortesis per al turmell y el peu
Anti DNA Antibodies	C0282056	Anticuerpos Anti-ADN	Anticossos anti-ADN
Anti DNA Antibodies	C0282056	anticuerpo anti - ADN	anticòs anti - ADN
Antibodies	C0003241	Anticuerpos	Anticossos
Antibody		Anticuerpo	Anticòs
Antibody Formation	C0003261	Formacion de Anticuerpos	Formació d'Anticossos
Anticardiolipin Antibody	C0162596	anticuerpo anticardiolipina	anticòs anticardiolipina
Anticholinergic		Anticolinérgico	Anticolinèrgic
Antigen	C0003320	Antígeno	Antigens
Antigen Receptor, T-Cell	C0034790	Receptores de Antigeno de Linfocitos T	Receptors d'Antigen de Limfòcits T
Antigen-1, Lymphocyte Function-Associated, LFA-1	C0079717	Antigeno-1 Asociado a Funcion Linfocitaria, LFA-1	Antigen-1 associat a funció limfocitària, LFA-1
Antigen, CD134	C0248554	Antigenos CD134	Antigens CD134
Antigen, CD26	C0081937	Antigenos CD26	Antigens CD26
Antigens, CD25	C1101536	Antigenos CD25	Antigens CD25
Antigens, CD4	C0003323	Antigeno CD4	Antigens CD4
Antigens, CD44	C0243982	Antigenos CD44	Antigens CD44
Antigens, CD8	C0085358	Antigenos CD8	Antigens CD8
Antigens, HLA	C0019721	Antigenos HLA	Antgens HLA
Antigens, HLA C	C0019751	Antigenos HLA-C	Antigens HLA-C
Antiphospholipid Antibody	C0162595	Anticuerpos Anti Fosfolipidos	Anticossos anti-fosfolípids
Aphasia	C0003537	Afasia	afàsia
Apitherapies	C2717877	Apiterapia	apiteràpia
Asians	C0078988	raza asiática	raça asiàtica
Aspiration		Aspiración	Aspiració
Aspiration pneumonia		Pulmonía por aspiración	Pulmonía per aspiració
Asthenia	C0004093	Astenia	Astènia
Astrocyte	C0004112	Astrocito	Astròcits
Astroprotein	C0017626	Proteína del Filamento Intermediario Glial	Proteïna del Filament Intermediari Glial
Ataxia	C0004134	Ataxia	Atàxia
Ataxic gait		Marcha atáxica	Marxa atàxica
Ataxic stance		Parada atáxica	Parada atàxica
Atrophy		Atrofia	Atròfia
Auditory Evoked Potential	C0015215	potencial evocado auditivo	potencial evocat auditiu
Automimmune disease		Enfermedad autoinmune	Malaltia autoimmune
Autonomic Nervous System	C0004388	Sistema Nervioso Autónomo	Sistema Nerviós Autònom
Axon	C0004461	Axón	Axó
Axon Terminals	C0206181	Terminal axónico	terminació axònica
Azathioprine	C0004482	Azatioprina	azatioprina
B 12, Vitamin	C0042845	vitamina B12 - cianocobalamina	vitamina B12 - cianocobalamina
B cell		Célula B	Cèl·lula B
B Cell Differentiation Factor, IL-6	C0021760	Factor de diferenciación célula B, IL-6	Factor de Creixement de Plasmacitoma
B Cell Growth Factor II, IL-5	C0021759	Factor II de Crecimiento de Celula B, IL-5	Factor II de Creixement de Cèl·lula B, IL-5
B Cell Proliferating Factor	C0021758	Factor I de Crecimiento de Celula B, IL-4	Factor I de Creixement de Cèl·lula B, IL-4
B Cell Proliferating Factor, IL-4	C0021758	Binetrakina - Factor de proliferación de céluals B	Binetrakina
B Cells	C0004561	Celulas B	Cèl·lules B
B Cells	C0004561	Células B	cèl·lules B
B-Cell Activation Antigen, CD80	C0104998	Antigeno de Activacion de Celula B, CD80	Antigens d'activació de cèl·lules B, CD80
B-Lymphotropic Virus, Human, HHV6 - herpesvirus humano 6	C0019381	Virus Linfotropico-B Humano, Herpesvirus Humano 6	Virus Limfotròpic-B Humà, Herpesvirus Humà 6
B12 Vitamin	C0042845	vitamina B12	vitamina B13
Babinski Reflex	C0034935	Reflejo de Babinski	Refleix de Babinski
Baclofen	C0004609	Baclofeno	baclofèn
Baclofen pump		Bomba de Baclofeno	Bomba de Baclofeno
Barrier, Blood-Brain	C0005854	Barrera Hemato-encefálica	barrera hematoencefàlica
Behavior Therapies, Cognitive	C0009244	Terapia Cognitiva	Terapia Cognitiva
Behavior, Sex	C0036864	Actividad Sexual	Activitat sexual
Bell’s palsy		Parálisis de Bell	Paràlisi de Bell
Benzeneacetic acid, alpha-(hydroxymethyl)-, 9-methyl-3-oxa-9-azatricyclo(3.3.1.02,4)non-7-yl ester, (7(S)-(1alpha,2beta,4beta,5alpha,7beta))-	C0036442	escopolamina	escopolamina
benzhydrylsulfinylacetamide	C0066677	modafinilo	modafinil
Benzodiazepines	C0005064	Benzodiacepinas	benzodiazepina
Ber-H2 Antigen, CD30, Ki-1	C0054950	Antigenos Ber-H2	Antigens Ber-H2
beta Interferon	C0015980	Interferon beta	Interferó beta
Betadexamethasone	C0005308	Betadexametasona	Betadexametasona
Biscyclohexanone Oxaldihydrazone, cuprizone	C0010460	Bisciclohexanona Oxaldihidrazona, cuprizona	Bisciclohexanona Oxaldihidrazona, cuprizona
Bladder		Vejiga	bufeta
Blinding		Evaluación a ciegas	Evaluació a cegues
Block, Nerve	C0027741	Bloqueo Nervioso	Bloqueig nerviós
Blood-brain barrier		Barrera hemato-encefálica	Barrera hemato-encefàlica
Bone-Derived Transforming Growth Factor, TGF-beta	C0040690	Factor Transformador de Crecimiento Oseo Derivado, TGF-beta	Factor transformador de creixement ossi derivat, TGF-beta
Borreliosis, Lyme	C0024198	Enfermedad de Lyme - borreliosis	malaltia de Lyme - borreliosi
Botulin	C0006055	Botulina	Botulina
Brain	C0006104	Cerebro	encèfal - cervell
Brain derived nerve factor, BDNF	C0107103	Factor Neurotrófico Derivado del Encéfalo, BDNF	Factor Neurotròfic Derivat de l'encèfal, BDNF
Brain ventricle		Ventrículo cerebral	Ventrcle cerebral
Brainstem Auditory Evoked Potential BAEP (abbr.)		Potenciales Evocados Auditivos. PEA (abrev.)	Potencials Evocats Auditivos. PEA (abrev.)
BRCA1 Gene	C0376571	Gen BRCA1	Gen BRCA1
Burkitt Herpesvirus, Epstein Barr virus, Herpesvirus Humano 4	C0014644	Epstein Barr virus, Herpesvirus Humano 4. Herpesvirus de Burkitt	Epstein Barr virus, Herpesvirus Humà 4, Herpesvirus de Burkitt
Burst Promoting Factor, Erythrocyte, IL-3	C0021757	Factor 2 alfa Estimulante de Colonias, IL-3	Factor 2 alfa estimulant de colònies, IL-3
C-reactive protein	C0006560	Proteina C-Reactiva	Proteïna C-Reactiva
Cachectin, Tumor necrosis factor, TNF-alfa	C1456820	Caquectina, Factor de Necrosis Tumoral alfa, TNF-alfa	caquectina, Factor alfa de Necrosi Tumoral, TNF-alfa
Callosum, Corpus	C0010090	Cuerpo Calloso	cos callós
Cannabinoids	C0006864	Canabinoides	cannabinoids
Cannabis	C0936079	Cannabis	cànnabis
Carbamazepine	C0006949	Carbamacepina	carbamazepina
Carisoprodate	C0007248	Carisoprodato	Carisoprodat
Caspase 2, ICH-1 Protease, CASP2	C0259419	Caspasa 2, CASP2	caspasa 2
Caspase 8	C0667830	Caspasa 8	CASP8
Caspase-10	C0758959	Caspasa 10	caspasa 10
Catecholamines	C0007412	Catecolaminas	catecolamines
Catheter, urinary		Catéter urinario o Sonda urinaria	Catèter urinari o Sonda urinària
Caucasians	C0043157	Caucasian	caucàsic
Caudate Nucleus	C0007461	Nucleo Caudado	Nucli Caudadat
CD 16 Antigens	C0108747	Antigenos CD16	Antigens CD16
CD45 Antigen	C0054961	Antigenos CD45	Antigens CD45
CD45 Antigen	C0054961	Antigenos Comunes de Leucocito	Antigens comuns de leucòcit
CD45 Antigen	C0054961	Antígenos CD45	Antigens CD45
Cell Mediated Immunity	C0020966	Inmunidad Celular	Immunitat cel·lular
Cell Mediated Lympholytic Cells	C0039195	Linfocitos T Citotoxicos	Limfòcits T citotòxics
Cell Migration	C1622501	Migracion Celular	migració cel·lular
Cell, Dendritic	C0011306	Celulas Dendriticas	cèl·lules dendrítiques
Cell, Natural Killer, NK	C0022688	Celulas Asesinas Naturales, NK	cèl·lula assesina natural, NK
Cells, Neural Stem	C1113654	Celulas-Madre Nerviosas	cèl·lules mare nervioses
Central nervous system CNS (abbr.)		Sistema nervioso central SNC (abrev.)	Sistema nerviòs central SNC (abrev.)
Ceramides, Galactosyl	C0016960	Galactosil Ceramidas	Galactosil Ceramidas
Cerebellum	C0007765	Cerebelo	Cerebel
Cerebral		Cerebral	Cerebral
Cerebral Cortex	C0007776	Cortex Cerebral	Còrtex cerebral
Cerebral Sclerosis, Diffuse, Schilder disease	C0007795	Esclerosis cerebral difusa, Enfermedad de Schilder, Esclerosis Mielinoclastica Difusa	Esclerosi cerebral difusa, malaltia de Schilder, Esclerosi Mielinoclastica Difusa
Cerebral ventricle		Ventrículo cerebral	Ventrícle cerebral
Cerebrospinal fluid CSF (abbr.)		Líquido cefalorraquídeo LCR (abrev.)	Líquid cefalorraquídi LCR (abrev.)
Cerebrum		Cerebro	Cervell
Channel, Potassium	C0032824	Canales de Potasio	Canals de potassi
Channel, Sodium	C0037492	Canales de Sodio	canals de sodi
Chemoattractant Factor, Lymphocyte, IL-16	C0065337	Factor Quimioatractivo de Linfocito, IL-16	Factor Quimioatractiu de Limfòcit, IL-16
Chemokines	C0282554	Quemoquina, Quimiocinas	Quemoquinas, Quimiocines
Chemotherapies	C0013216	Quimiterapia	Quimioteràpia
Chickenpox Virus	C0042338	Virus de la Varicella-Zoster	Virus de la Varicel·la-Zoster
Chlorpromazine	C0008286	Clorpromacina	cloropromazina
Chlorpromazine	C0008286	Clorpromazina	cloropromazina
Cholecalciferol vitamin D3	C0008318	colecalciferol vitamina D3	colecalciferol vitamina D4
Cholesterol	C0008377	Colesterol	Colesterol
Chromogranin A	C0055633	Cromogranina A	Cromogranina A
Chromogranin B	C0055635	Cromogranina B, Secretogranina I	Cromogranina B, Secretogranina I
Chronic		Crónico	Crónic
Chronic progressive		Crónico progresivo	Crónic progresiu
Cilliary neurotrophic factor, CNTF	C0207071	Factor Neurotrófico Ciliar, CNTF	Factor Neurotròfic Ciliar, CNTF
Clamidia, Miyagawanella	C0008148	Clamidia	Clamídia
Clinical finding		Hallazgos clínicos	Troballes clíniques
Clinical trial		Estudio clínico o Ensayo clínico	Estudi clínic o Assaig clínic
Clinically Isolated Syndrome CIS (abbr.)		Síndrome clínicamente aislado	Síndrome clínicament aïllat
Clonazepam	C0009011	Clonazepam	Clonazepam
Clonus		Clonus	Clonus
Cognition		Conocimiento o Cognición	Coneixement o Cognició
Cognitive impairment		Deterioro cognitivo	Limitació cognitiva
Cognitive rehabilitation		Rehabilitación cognitiva	Rehabilitació cognitiva
Combined bladder dysfunction		Disfunción neurogénica combinada de la vejiga urinaria	Disfunció neurogènica combinada de la bufeta urinària
Complement 3	C0009506	C3 (H20) - complemento 3	C3 (H20)
Complement 4	C0009516	C4 - componente 4 del complemento	C4 - component 4 del complement
Complement 4	C0009516	cuarto componente del complemento	quart component del complement
Complement 7	C0009524	Complemento C7	Complement C7
Complement 9	C0009526	Complemento C9	Complement C9
Complement Protein	C0009498	Proteinas del Sistema Complemento	Proteïnes del Sistema Complement
Computerized axial tomography CAT scan (abbr.)		Tomografía axial computarizada. TAC (abrev.)	Tomografia axial computaritzada. TAC (abrev.)
Condom catheter		Catéter de condón	Catèter de condó
Constipation	C0009806	Estreñimiento	restrenyiment
Contactins	C0056257	Contactinas	contactines
Contraction		Contracción	Contracció
Contracture		Contractura	Contractura
Contrast Media	C0009924	Medios de Contraste	Medis de contrast
Controlled study		Estudio controlado	Estudi controlat
Coordination		Coordinación	Coordinació
Cord, Spinal	C0037925	Médula Espinal	medul·la espinal
Corpus Callosum		Cuerpo calloso	Cos callós
Cortex		Corteza cerebral	escorça cerebral
Corticosteroids		Corticosteroides	Corticosteroides
Cortisone	C0010137	Cortisona	Cortisona
Coxa	C0019552	Cadera	maluc
Cranial nerves		Nervios craneales	Nervis craneals
Curcumin	C0010467	Curcumina	curcumina
Cyclizine	C0010547	Ciclicina	ciclizina
Cyclizine	C0010547	Ciclizina	ciclizina
Cyklooxygenas 2	C0387583	Ciclooxigenasa 2	Ciclooxigenasa 2
Cystoscopy		Cistoscopia	Cistoscòpia
Cystostomy		Cistotomía	Cistotomia
Cytokines	C0079189	Citocinas	citoquines
Cytokines	C0079189	citoquina	citoquina
Dacliximab	C0663182	daclizumab	daclizumab
Damage to the nervous system		Daño al sistema nervioso	Dany al sistema nerviòs
Decubitus ulcer		Ulcera de decúbito o Ulcera de presión	Úlcera de decúbit o Úlcera de presió
Deep tendon reflexes		Reflejos de los tendones profundos	Reflexes dels tendons profunds
Degeneration, Wallerian	C0043020	Degeneracion Walleriana	degeneració wal·leriana
Deglutition Disorders	C0011168	Disfagia	disfàgia
Dehydrocortisone	C0032952	Deshidrocortisona	Deshidrocortisona
Dementia	C0497327	Demencia	Demència
Demyelination		Desmielinización	Desmielinització
Dendrite	C0011305	Dendritas	Dendrites
Depressed mood	C0344315	Estado depresivo	deprimit
Depressions	C0011570	Depresión	Depressió
Depressions, Endogenous	C0011573	Depresion Endogena	Depressió endògena
Detrusor-external sphincter dyssynergia		Disinergia del esfínter detrusor externo	Disinèrgia del esfínter detrusor extern
Dexamethasone	C0011777	Dexametasona	Dexametasona
Diagnoses, Differential	C0011906	Diagnostico Diferencial	Diagnòstic diferencial
Diagnosis		Diagnóstico	Diagnòstic
diagnostic procedure	C0430022	procedimiento diagnóstico	procedimient diagnostic
Diathermy, Surgical	C0013804	Diatermia Quirurgica	diatèrmia quirúrgica
Diazepam	C0012010	Diacepam	Diazepam
Dimenhydrinate	C0012381	Difenhidramina	dimenhidrinat
Diplopia	C0012569	Diplopia	diplopia
Disability		Discapacidad	Discapacitat
disease		enfermedad	Malaltia
Disease modifying agent DMA (abbr.)		Agentes modificadores de la enfermedad	Agents modificadors de la malaltia
Disease-modifying drugs DMD (abbr.)		Fármacos modificadores de la enfermedad	fàrmacs modificadors de la malaltia
Disease-modifying therapy DMT (abbr.)		Terapias modificadoras de la enfermedad	teràpies modificadores de la malaltia
Dizziness	C0012833	Mareo	Mareig
DNA		ADN	ADN
Double-blind clinical study		Estudio clínico o doble-ciego	estudi clínic o doble cec
Drugs	C0013227	Drogas - Fármacos	drogues - fàrmacs
Dynorphin	C0013355	Dinorfinas	dinorfines
Dysarthria	C0013362	Disartria	disàrtria
Dysesthesia	C0392699	Disestesia	disestèsia
Dysfunction, Erectile	C0242350	Disfuncion Erectil, Impotencia	disfunció erèctil, Impotència
Dysmetria		Dismetría	dismetria
Dysphasia	C0973461	Disfasia	disfàsia
Dysphonia		Disfonía	disfonia
Ekbom's Syndrome	C0035258	piernas inquietas, Sindrome de Ekbom	cames inquietes, Síndrome d'Ekbom
ELAM-1, Antigen CD62e	C0115305	Molecula-1 de Adhesion de Leucocito Endotelial, ELAM-1	Mol·lècula-1 d'Adhesió de Leucòcit Endotelial, ELAM-1
Electric Stimulation	C0013786	Estimulacion Electrica	estimulació elèctrica
Electroencephalography, EEG	C0013819	Electroencefalografia, EEG	Electroencefalografia, EEG
Electromyography EMG (abbr.)		Electromiografía EMG (abrev.)	Electromiografia EMG (abrev.)
Electrophoreses	C0013855	Electroforesis	electroforesi
Endocrine system		Sistema endocrino	sistema endocrí
Endorphin	C0014242	Endorfinas	endorfines
Endothelium	C0014257	Endotelio	endoteli
Enkephalin	C0014298	Encefalinas	encefalines
Erectil dysfunction ED (abbr.)		Disfunción eréctil	disfunció erèctil
Esophageal Reflux	C0017168	Reflujo esofágico	Reflux esofágic
Esthesia	C0036658	Funcion Sensitiva	funció sensitiva
Etiology		Etiología	etiologia
Euler-Gaddum Substance P	C0038585	Substancia P	Substancia P
Euphoria	C0235146	Euforia	eufòria
Evoked Potential, Somatosensory	C0015216	potencial evocado somatosensitivo	potencial evocat somatosensitiu
Evoked Potential, Visual	C0015217	potencial evocado visual	potencial evocat cortical visual
Evoked potentials		Potenciales Evocados	potencials evocats
Exacerbation		Exacerbación o Recaída o Brote	exacerbació o recaiguda o brot
Examination, Neurological	C0027853	Examen Neurologico	examen neurològic
Examination, Physical	C0031809	Examen Fisico	examen físic
Expanded disability status scale EDSS (abbr.)		Escala extendida del estado de discapacidad, EDSS	escala ampliada de l'estat de discapacitat, EDSS
EDSS 0		EDSS 0	EDSS 0
EDSS 0.5		EDSS 0,5	EDSS 0,5
EDSS 1.0		EDSS 1,0	EDSS 1,0
EDSS 1.5		EDSS 1,5	EDSS 1,5
EDSS 2.0		EDSS 2,0	EDSS 2,0
EDSS 2.5		EDSS 2,5	EDSS 2,5
EDSS 3.0		EDSS 3,0	EDSS 3,0
EDSS 3.5		EDSS 3,5	EDSS 3,5
EDSS 4.0		EDSS 4,0	EDSS 4,0
EDSS 4.5		EDSS 4,5	EDSS 4,5
EDSS 5.0		EDSS 5,0	EDSS 5,0
EDSS 5.5		EDSS 5,5	EDSS 5,5
EDSS 6.0		EDSS 6,0	EDSS 6,0
EDSS 6.5		EDSS 6,5	EDSS 6,5
EDSS 7.0		EDSS 7,0	EDSS 7,0
EDSS 7.5		EDSS 7,5	EDSS 7,5
EDSS 8.0		EDSS 8,0	EDSS 8,0
EDSS 8.5		EDSS 8,5	EDSS 8,5
EDSS 9.0		EDSS 9,0	EDSS 9,0
EDSS 9.5		EDSS 9,5	EDSS 9,5
EDSS 10		EDSS 10	EDSS 10
Experimental allergic encephalomyelitis EAE (abbr.)		Encefalomielitis alérgica experimental	encefalomielitis al·lèrgica experimental
Extensor spasm		Espasmo en extensión	espasme en extensió
Facial Neuralgia	C0015467	Neuralgia Facial	Neuralgia Facial
Facial Pain	C0015468	Dolor Facial	dolor facial
Facial Paralysis	C0015469	Parálisis facial	Paràlisi facial
Factor, Risk	C0035648	factor de riesgo	factor de risc
Failure to empty (bladder)		Falla (dificultad) en el vaciado de la vejiga.	dificultat vuidar la bufeta
Failure to store (bladder)		Falla (dificultad) de retencion de la orina en la vejiga	dificultat retencio de la bufeta
Fatigue	C0015672	Fatiga	Fatiga - cansament
Febrile Inhibitor, IL1	C1704264	Proteina Antagonista del Receptor de la Interleucina 1	Proteïna Antagonista del Receptor de la Interleucina 1
Female	C0015780	Mujer	femella - femení - femenina
Finger to nose test		Prueba dedo nariz	Prova dit nas
Flaccid		Flacidez	flacciditat
Flexor spasm		Espasmo en flexión	Espasme en flexió
Foley catheter		Sonda Foley	Sonda Foley
Folic Acid	C0016410	Acido Folico	àcid fólic
Frontal lobes		Lóbulos frontales	lòbuls frontals
Functional MRI, fMRI	C0376335	Resonancia magnética Funcional	Resonancia magnetica Funcional
Gadolinium		Gadolinio	gadolini
Gadolinium enhancing lesion		Lesión captante de contraste	lesió captant de contrast
Gait		Marcha o Manera de caminar	marxa
Gangliosides	C0017082	Gangliósido	Gangliosids
Gastrocolic reflex		Reflejo gastrocólico	reflex gastrocòlic
Gastrointestinal	C0017189	conducto gastrointestinal	conducte gastrointestinal
Gastrointestinal tract	C0017189	Tracto Gastrointestinal	Tracte Gastrointestinal
Gastrointestinal tract	C0017189	estructura del aparato digestivo	estructura del aparell digestiu
Gastroscopy		Gastroscopía	gastroscòpia
Gastrostomy		Gastrostomía	Gastrostomia
Gelsolin	C0061187	Gelsolina	Gelsolina
Gene		Gen	Gen
Glia	C0027836	Glia	Glia
Glial Fibrilar Acid Protein, GFAP	C0017626	Proteína Ácida Fibrilar de la Glía	Proteïna Àcida Fibrilar de la Glia
Globus Pallidus	C0017651	Globo Palido	Globus Pàlid
Glucitol, sorbitol	C0037688	Glucitol, sorbitol	Glucitol, sorbitol
Glucocorticoid hormones		Hormonas glucocorticoides	Hormones glucocorticoides
Glucocorticoids	C0017710	Glucocorticoides	Glucocorticoïdes
Handicap		Desventaja	desavantatge
Haptoglobin	C0018595	haptoglobina	haptoglobina
Heel-knee-shin test		Prueba talón- rodilla	Prova taló-genoll
Helper Cells	C0018894	Celulas Colaboradoras	limfòcit T col·laborador
Helper T-lymphocytes		Linfocitos T inductores o ayudantes	limfòcits T inductors o col·laboradors
Hemiparesis		Hemiparesia	hemiparèsia
Hemiplegia	C0018991	Hemiplejia	Hemiplegia
Herpesviridae	C0019369	Herpesvirus	Herpesvirus
Herpesviridae	C0019369	familia Herpesviridae	família Herpesviridae
Herpesviridae	C0019369	familia: grupo del virus del herpes	família: grup del virus del herpes
Herpesvirus type 6	C0019381	virus del herpes humano 6	virus del herpes humano 6
Hippocampus	C0019564	Asta de Ammon	banya d'Ammon
Hippocampus	C0019564	Hipocampo, Asta de Ammon	Hipocamp, banya d'Ammon
Histamine	C0019588	Histamina	Histamina
History, Natural	C0175860	Historia Natural	Història Natural
HMG CoA Reductase Inhibitors	C0360714	Inhibidores de HMG CoA Reductasa	Inhibidors de HMG CoA Reductassa
Homocysteine	C0019878	Homocisteína	Homocisteïna
Homocysteine	C0019878	Homocisteína	Homocisteina
Human immunodeficiency virus, HIV	C0019682	HIV - virus de la inmunodeficiencia humana	HIV-virus de la immunodeficiència humana
Humoral Immunity	C0020967	Inmunidad Humoral	immunitat humoral
Hydrazide, Isonicotinic Acid	C0022209	Hidracida del Acido Isonicotinico	Hidracida de l'Àcid Isonicotínic
Hypoacusis	C1384666	Hipoacusia	hipoacúsia
Hypoesthesia	C0020580	Hipoestesia	Hypoestesia
IGFBP-3	C0123707	proteína 3 fijadora del factor de crecimiento seudoinsulínico	proteïna 3 fixadora del factor de creixement seudoinsulínic
IL-1	C0021755	IL-1	IL-1
IL-1 beta	C0021753	interleukina 1 beta	interleuquina 1 beta
IL-12	C0123759	IL-12	IL-12
IL-13	C0214743	IL-13	IL-13
IL-15	C0254610	IL-15	IL-15
IL-17	C0384648	IL-17	IL-17
IL-18	C0383327	IL-18	IL-18
IL-2	C0021756	IL-2	IL-2
IL-23	C0963088	IL-23	IL-23
IL-7	C0021761	IL - 7	IL - 7
IL-7 receptor, IL-7R	C0083032	Receptores IL-7	Receptors IL-7
IL-9	C0085424	IL-9	IL-9
IL.10	C0085295	IL - 10	IL - 10
Immune system		Sistema inmunológico	sistema immunològic
Immune Tolerance	C0020963	tolerancia inmune	tolerancia immune
Immune-mediated		Enfermedad inmunomediada	malaltia inmunomedida
Immunity, Non Specific	C0020969	Inmunidad no Especifica	inmunitat no específica
Immuno-suppression		Inmunosupresión	immunosupressió
Immunocompetent cells		Células inmunocompetentes	cèl·lules immunocompetents
Immunoglobulin		Inmunoglobulina	immunoglobulina
Immunology		Inmunología	immunologia
Impairment		Impedimento o Incapacidad	deficiència
Incidence		Incidencia	incidència
Incontinence		Incontinencia	inconctinència
Incontinence, Urinary	C0042024	Incontinencia urinaria	incontinència urinaria
Indwelling catheter		Catéter vesical permanente	catèter urinari permanent
Infection	C0021311	Infeccion	Incfecció
Infections, Upper Respiratory	C0041912	Infecciones del Tracto Respiratorio Superior	Infeccions del tracte respiratori superior
Inflammation		Inflamación	inflamació
Intention tremor		Temblor de intención	Tremor de intenció
Interferon beta		Interferón beta	interferó beta
Interferon gamma		Interferón gama	interferó gamma
Interferon IFN (abbrev.)		Interferón IFN	Interferó IFN
Interleukin	C0021764	Interleucinas	Interleucines
Interleukin 1 beta, IL-1 beta	C0021753	Interleucina-1 beta, IL-1 beta	Interleucina-1 beta, IL-1 beta
interleukin-1-alpha, IL-1 alfa	C0600251	Interleucina-1 alfa, IL-1 alfa	Interleucina-1 alfa, IL-1 alfa
Intermittent selfcatheterization		Cateterización intermitente realizada por uno mismo	Autocateterisme
Internuclear opthalmoplegia		Oftalmoplejia intranuclear	oftalmoplegia intranuclear
Intestine	C0021853	Intestinos	intestins
Intimacy		Intimidad	intimitat
Intrathecal space		Espacio intratecal	espai intratecal
Intravenous		Intravenoso	intravenós
Iron	C0302583	Hierro	Ferro
Itching	C0033774	Picor, prurito	Picor
JC Virus	C0022369	poliomavirus hominis 2, virus JC	poliomavirus hominis 3, virus JC
Jerking, Myoclonic	C0027066	Mioclonia	Mioclònia
L Tryptophan	C0041249	L - triptofano	L-triptofa
LAM-1, CD62I	C0125090	LAM-1, CD62l	LAM-1 CD62L
lamotrigine	C0064636	lamotrigina	lamotrigina
Lesion		Lesión	lesió
Leukocyte	C0023516	Leucocito	Leucocit
Lhermitte’s sign		Signo de Lhermitte	Signe de Lhermitte
Libido		Libido	libido
Life Qualities	C0034380	Calidad de Vida	Qualitat de vida
Lipids	C0023779	Lipidos	Lípids
Lumbar Puncture	C0037943	Punción lumbar	Punció lumbar
Lumbar region		Región lumbar	regió lumbar
Lungs	C0024109	Pulmon	Pulmó
Lymphocyte		Linfocito	limfòcit
Lymphocyte T, cell T, Thymus-Dependent	C0039194	Celulas T	Cèl·lules T
Lysolecithin	C0024360	lisolecitina	lisolecitina
Macrophage		Macrófago	macròfag
Magnetic Resonance Imaging, MRI	C0024485	Resonancia magnética	imatgeria per ressonància magnètica
Magnetic Resonance Spectroscopies, MRS	C0024487	Espectroscopia por resonancia magnética	espectroscòpia MR
Male	C0024554	Varón, masculino, macho	Masculí - Mascle
Malonaldehyde	C0024643	Malonaldehido	Malonaldehido
Marihuana	C0024808	Marihuana	Marihuana
Matrix Metalloproteinase 9	C0165519	Metaloproteinasa 9	Gelatinasa B
matrix metalloproteinase, MMP	C0623362	Metaoloproteasa, MMP	Metaloproteasa, MMP
Meclizine	C0025039	Meclizina	Meclicina
Medical history		Historia clínica	Història clínica
Medulla Oblongata	C0025148	Bulbo Raquideo	Bulb Raquidi
Memory impairment	C0233794	Alteración de memoria	Alteració de memoria
Mesenchylam stem cell	C1257975	célula pluripotencial mesenquimática	cèl·lula pluripotencial mesenquimàtica
Metaclopramide	C0025853	Metoclopramida	Metoclopramida
Metalloproteaser	C0025543	Metaloproteasas, Metaloproteinasas	Metaloproteasas
Metalloproteaser	C0025543	metaloproteinasa	metaloproteïnasa
Methodology	C0025664	metodos	mètodes
Methylphenidate	C0025810	Metilfenidato	Metilfenidat
Microbiomes	C1956108	Microbioma	Microbioma
Microglia	C0206116	Microglia	Microglia
Mimicries, Molecular	C0242943	Similutud Molecular	Imitació Mol.lecular
Mitoxantrone, DHAQ	C0026259	Mitoxantrona	Mitoxantrona
Mixed incontinence		Incontinencia mixta	incontinència mixta
Monoclonal antibodies		Anticuerpos monoclonales	anticossos monoclonals
Monocytes	C0026473	Monocitos	Monòcits
Motor Neuron	C0026609	neurona motora, motoneurona	neurona motora, motoneurona
Movement	C0026649	Movimiento	Moviment
MRI (Magnetic Resonance Imaging)		RM (Imagen de resonancia magnética)	imatgeria per ressonància magnètica
MS (Multiple Sclerosis)		EM (Esclerosis Múltiple)	EM Esclerosi Múltiple
Multiple Sclerosis functional composite MSFC (abbr.)		Escala funcional de esclerosis múltiple	escala funcional d'esclerosi múltiple
Multiple sclerosis MS (abbr.)		Esclerosis múltiple EM (abrev.)	Esclerosi múltiple EM (abrev.)
Multiple sclerosis, chronic progressive	C0393665	Esclerosis Multiple Cronica Progresiva	Esclerosi Múltiple Crònica Progressiva
Muscle Spasticity	C0026838	Espasticidad Muscular	espasticidad muscular
Muscle tone		Tono muscular	to muscular
Myelin		Mielina	mielina
Myelin basic protein		Proteína básica de la mielina	proteïna bàsica de la mielina
Myelin Sheath	C0026973	Vaina de Mielina	Beina de Mielina
Myelitides	C0026975	mielitis, Inflamacion de la Medula Espinal	Inflamació de la medul·la espinal
Myelitis		Mielitis	mielitis
Myelogram		Mielograma	mielograma
Myokymia	C0684219	Mioquimia	Miocímia
Natalizumab	C1172734	Natalizumab	Natalizumab
Natural Killer T-Cell, NKT	C2350466	Celulas T Asesinas Naturales, NKT	cèl·lula T citocida natural, NKT
Nerve		Nervio	Nervi
Nerve Growth Factor	C0027752	Factor crecimiento nervioso	Factor creixement nervios
Nerve, Optic	C0029130	Nervio Óptico	nervi òptic
Nerves, Peripheral	C0031119	Nervios Perifericos	nervis perifèrics
Nervous system		Sistema nervioso	Sistema Nerviós
Neural Receptor	C0034837	Receptor neural	Receptor neural
Neuralgias, Trigeminal	C0040997	Neuralgia del Trigemino	Neuralgia del Trigèmin
Neuritides, Optic	C0029134	Neuritis Optica	Neuritis òptica
Neuroendocrine		Neuroendocrino	Neuroendocrí
Neurogenic bladder		Vejiga neurogénica	bufeta urinària neurogènica
Neurologist		Neurólogo (m) Neuróloga (f)	neuròleg -òloga
Neuron	C0027882	Neurona	Neurona
Neuropeptide	C0027895	Neuropeptidos	neuropèptids
Neuropsychologist		Neuropsicólogo (m) Neuropsicóloga (f)	neuropsicòleg -òloga,
Neurotransliter	C0027908	neurotransmisores	neurotransmisors
Newly-diagnosed		Recién diagnosticado(a)	Nou diagnostic
NF-Kappa B p65, RelA	C0214222	KF-kappa beta p 65, Factor de Transcripcion ReIA	KF-kappa beta p 65, Factor de Transcripció ReIA
Nigra, Substantia	C0038590	Sustancia Nigra	Substància Negra
Nitrates	C0028125	nitratos	nitratos
Nitric oxide	C0028128	Oxido Nitrico	òxid nítric
Nocturia		Nicturia	nictúria
Nodes, Ranvier's	C0034667	Nodos de Ranvier	Nodes de Ranvier
Nucleus, Red	C0034910	Nucleo Rojo	nucli vermell
Nystagmus	C0028738	nistagmo	nistagme
Occipital Lobes	C0028785	Lobulo Occipital	Lòbul occipital
Oculomotor Nerve Palsies	C0028866	Parálisis nervio oculomotor	Parálisi nervi oculomotor
Oligoclonal band	C0069426	Bandas Oligoclonales	Bandes Oligoclonals
Oligoclonal band	C0069426	Inmunoglobulinas Oligoclonales	Immunoglobulines Oligocionals
Oligodendrocyte		Oligodendrocito	oligodendròcit
Ondansetron	C0061851	Ondansetron	Ondansetró
Ondansetron	C0061851	Ondansetrón	Ondansetró
Ophthalmoscope		Oftalmoscopio	oftalmoscopi
Optic atrophy		Atrofia óptica	atròfia òptica
Optic Chiasma	C0029126	Quiasma óptico	quiasma òptic
Optic disc		Disco óptico	disc òptic
Optic neuritis		Neuritis óptica	neuritis òptica
Optical Coherent Tomography	C0920367	Tomografía de Coherencia Óptica	Tomografia de Coherència Òptica
Orthosis or Orthotic		Ortesis	ortesi,
Orthotist		Ortopeda	ortopeda
Oscillopsia		Oscilopsia	oscil·lòpsia
Osteopontin	C0069676	Osteopontina	Osteopontina
Osteoporosis		Osteoporosis	osteoporosi
Overactive bladder		Vegija hiperactiva	bufeta hiperactiva
Overflow incontinence		Incontinencia por rebosamiento o Incontinencia por goteo	incontinència per sobreeiximent,
oxcarbazepine	C0069751	Oxcarbazepine	Oxcarbazepine
oxcarbazepine	C0069751	oxcarbacepina	oxcarbacepina
Oxidative Stress	C0242606	Estres Oxidativo	estrès oxidatiu
Pain	C0030193	Dolor	dolor
Palsy	C0522224	Paralisis, plegia	paràlisi
Paralysis		Parálisis	paràlisi
Paraparesis	C0221166	Paraparesia	Paraparèsia
Paraplegia		Paraplejía	paraplegia
Paresis	C0030552	Paresia	Parèsia
Paresthesia		Parestesia	parestèsia
Parietal Lobes	C0030560	Lobulo Parietal	Lòbul parietal
Paroxysmal spasm		Espasmo paroxístico	espasme paroxismal
Paroxysmal symptoms		Síntomas paroxísticos	símptomes paroxismals
Pemoline	C0030800	Pemolina	Pemolina
Percutaneous endoscopic gastrostomy PEG (abbr.)		Gastrostomía endoscópica percutánea	Gastrostòmia endoscòpica percutània
Peripheral Nervous System PNS (abbr.)		Sistema nervioso periférico SNP (abrev.)	Sistema nerviós perifèric
Periventricular region		Región periventricular	regió periventricular
Pharmaceutical Economics	C0206335	Farmacoeconomía	#REF!
Pharmacogenomics	C1138555	Farmacogenomica	Farmacogenòmica
Phenytoin	C0031507	Fenitoina	fenitoïna
Phosphene	C0031624	Fosfenos	Fosfens
physical therapy	C0949766	Fisioterapia (Tecnicas)	Fisioteràpia (Tècniques)
Plantar reflex		Reflejo plantar	reflex plantar
Plaque		Placa	placa
Plasma cell		Célula plasmática	cèl·lula plasmàtica
Plasma Exchange or Plasmapheresis		Recambio plasmático o Plasmaferesis	intercanvi plasmàtic o plasmafèresi
Plasmacyte	C0032112	Celulas Plasmaticas	cèl·lules plasmàtiques
Plasminogen inhibitor, Poretein C inhibitor, PAI-3	C0072348	Inhibidor 3 de Activador Plasminogenico, Inhibidor de Proteína C, IAP-3	IAP-3
Platelet derived growth factor B, PDGFB	C0072480	Factor B de Crecimiento Derivado de Plaqueta, FBCDP	FBCDP
Polymorphonuclear	C0027950	Polimorfonucleares	Polimorfonucleats
Pons	C0032639	Puente	Pont
Position sense		Sentido de posición o Sensibilidad postural	Sentit de posició o Sensibilitat Postural
Post-void residual test PVR (abbr.)		Evaluación del residuo post-miccional	Avaluació del Residu Post-Miccional
Postural tremor		Temblor postural	tremolor postural
Prealbumin	C0032923	Prealbumina	Prealbúmina
Prednisolone	C0032950	prednisolona (uso endocrino)	prednisolona (ús endocrí)
Primary Progressive MS		Esclerosis múltiple primaria progresiva	esclerosi múltiple primària progressiva
Primidone	C0033148	Primidona	Primidona
Prochlorperazine	C0033229	Proclorperazina	Procloorperazina
Prognoses	C0033325	Pronostico	pronòstic
Progressive-Relapsing MS		Esclerosis múltiple recurrente -progresiva	esclerosi múltiple recurrent-progressiva
Promethazine	C0033405	Prometacina	Prometacina
Propranolol	C0033497	Propanolol	Propanolol
Prospective memory		Memoria prospectiva	memòria prospectiva
Proteolipid protein, Folch Lees Protein, PLP	C0060617	Proteina Proteolipidica de la Mielina	Proteïna Proteolipídica de la Mielina
Pseudo-exacerbation		Pseudo-exacerbación	pseudo-exacerbació
Pseudobulbar affect		Síndrome pseudobulbar	pseudobulba
Putamen	C0034169	Putamen	Putamen
Pyramidal tracts		Vía piramidal	tracte piramidal
Pyuria		Piuria	Piuria
Quadriplegia		Cuadriplejía	quadriplegia
Race	C0034510	raza humana	raça humana
Randomized study		Estudio aleatorio o randomizado	estudi aleatori
Recent memory		Memoria reciente o Memoria a corto plazo	memòria a curt termini
Receptor, Transferrin, CD71	C0034845	Receptor Transferrina - CD71 - cluster de diferenciación 71	CD71 - clúster de diferenciació 71
Recur		Repetir o Reaparecer	repetir
Reflex		Reflejo	reflex
Rehabilitation		Rehabilitación	rehabilitació
Reil Insula	C0021640	Insula de Reil	Insula de Reil
Relapsing remitting multiple sclerosis, RRMS	C0751967	Esclerosis Multiple Recurrente-Remitente, EMRR	Esclerosi Múltiple Recurrent-Remitent, EMRR
Remission		Remisión	remissió
Remote memory		Memoria remota	memòria remota
Remyelination		Remielinización	Remielinització
Residual urine		Orina residual	orina residual
Resting or Static tremor		Temblor en reposo	tremolor en repòs
Retention	C0035280	Retencion	Retenció
Retrobulbar neuritis		Neuritis retrobulbar	neuritis retrobulbar
rituximab	C0393022	rituximab	rituximab
Romberg’s sign		Signo de Romberg	Signe de Romberg
Sacrum		Sacro	sacre
Sclerosis		Esclerosis	Esclerosi
Scotoma	C0036454	Escotoma	escotoma
Secondary progressive MS, SPMS		Esclerosis múltiple secundaria progresiva, EMSP	Esclerosi Múltiple secundària progressiva, EMSP
Selectins	C0282651	Selectinas	Selectinas
Self Tolerance	C0206119	Autotolerancia	autotolerància
Semliki forest virus	C0036636	virus Semliki Forest	virus Semliki Forest
Sensory		Sensorial o Sensitivo	Sensorial o sensitiu
Sepsis		Sepsis o Septicemia	sèpsia
Siderophilin	C0040679	Siderofilina	Siderofilina
Sign		Signo	signe
Sinucleina alfa	C0285890	alfa-nucleína	alfa-nucleïna
Sleep Disorders	C0851578	Trastornos del Sueno	Trastorns de la Son
Smoking	C0037369	Fumador, tabaquismo	Hàbit de fumar
Somatosensory evoked potencial SEP (abbr.)		Potencial evocado somatoestésico o Potencial evocado somatosensorial. PES (abrev.)	potencial evocat somatosensorial
Sounds	C0037709	Sonido	So
Spasm	C0037763	Espasmo, rampa	espasme, rampa
Spasticity		Espasticidad	espasticitat
Sphincter		Esfínter	esfínter
Sphingolipids	C0037900	Esfingolipidos	esfingolípids
Sphyncterotomy		Esfinterotomía	esfinterectomia
Spinal cord		Médula espinal	medul·la espinal
Spinal tap		Punción lumbar	punció lumbar
Spirometer		Espirómetro	espiròmetre
Stance ataxia		Ataxia proprioceptiva o Ataxia sensorial	at+axia sensorial
Stem cell		Célula madre	cèl·lula mare
Straight catheter		Sonda recta	sonda recta
Stress incontinence		Incontinencia de esfuerzo o Incontinencia de estrés	incontinència d'esforç
Stretch		Estiramiento	allargament
Stromal Cells	C0162597	Celulas Estromales	cèl·lules estromals
Subarachnoid space		Espacio subaracnoideo	espai subaracnoïdal,
Support group		Grupo de apoyo	grup de suport
Suppressor T-lymphocytes		Linfocitos-T supresores	Limfòcits T supressors
Swallow		Tragar o deglutir	deglutir
Symptom		Síntoma	símptoma
Synapses	C0039062	Sinapsis	Sinapsis
Syndromes	C0039082	Sindrome	Síndrome
T-cell		Célula T	cèl·lula T
Tandem gait		Marcha en tándem	marxa en tàndem
Tenotomy		Tenotomía	tenotomia
Thalamus	C0039729	Talamo	Tàlem
Theiler Murine Encephalomyelitis Virus, TEMV	C0206425	Virus de la Encefalomielitis Murina de Theiler	Virus de l'Encefalomielitis Murina de Theiler
Therapy, Cell	C0302189	Terapia Celular	Terapia Cel.lular
Thoracic spine		Columna torácica	columna toràcica
Tingling	C2242996	hormigueo	formigueig
Tissue		Tejido	teixit
Tisular inhibitor metaloproteinase 3, TIMP-3	C0210492	Inhibidor de Metaloproteinasa-3 Tisular, TIMP-3	Inhibidor de Metaloproteïnassa-3 Tissular, TIMPO-3
Titubation		Titubeo	Titubeig
Tonic seizure		Crisis tónica o Ataques tónicos	atac tònic
Transcutaneous electric nerve stimulation		Estimulación eléctrica nerviosa transcutánea	estimulació elèctrica nerviosa transcutània
Transurethral resection		Resección transuretral	resecció transuretral
Transverse Myelitis		Mielitis transversa	mielitis transversa
Tremor		Temblor	tremolor
Trigeminal neuralgia		Neuralgia del trigémino	neuràlgia del trigemin
Tubulin	C0041348	Tubulina (Proteina)	Tubulina (Proteïna)
Twins, fraternal		Gemelos dizigotos o fraternales	bessons dizigots o fraternals
Twins, identical		Gemelos monocigotos o identificos	Bessons monozigots o identics
Urethra		Uretra	uretra
Urge incontinence		Incontinencia de urgencia	incontinència d'urgència
Urinalysis		Examen de orina	examen d'orina
Urinary frequency		Frecuencia urinaria	freqüència urinària
Urinary hesitancy		dificultad para iniciar la micción	dificultat per a iniciar la micció
Urinary incontinence		Incontinencia urinaria	incontinència urinària
Urinary sphincter		Esfínter urinario	esfínter urinari
Urinary urgency		Urgencia urinaria	urgència Urinària
Valproate, Sodium	C0037567	Valprotao	Valproat
Vertigen	C0042571	Vértigo	Vertigen
Vibration sense		Sensibilidad a la vibración	Sensibilitat a la vibració
Virus	C0042776	virus	virus
Visual acuity		Agudeza visual	agudesa visual
Visual evoked potential VEP (abbr.)		Potenciales evocados visuales PEV (abrev.)	potencials evocats visuals PEV (abrev.)
VLA-4	C0209606	Integrina alfa4beta1	Integrina alfabeta1
White matter		Substancia blanca o Materia blanca	Substància blanca
Worsen		Empeorar	Empitjorar

## Sheet: Additional concepts
English	Spanish	Catalan
Abductor muscle	Músculo abductor	Múscul abductor
Accommodation	Acomodo, Ajuste (nombre) Acomodar (verbo) Adaptar (verb) Ajustar (verbo)	ajust (nom)
ACTH (abbr.)	Hormona adrenocortico-trópica (ACTH, por sus siglas en inglés)	Hormona adrenocortico-trópica (ACTH)
Activities of Daily Living ADL (abbr.)	Actividades de la vida diaria	Activitats de la vida diària
Acupuncture	Acupuntura	Acupuntura
Acute	Agudo	Agut
Acute attack	Ataque agudo o Exacerbación o Recaída	Atac agut
ADA (abbr.)	‘Ley sobre Estadounidenses con Discapacidades’	Llei sobre ciutadans nord-americans amb discapacitats
Adductor muscle	Músculo aductor	Múscul aductor
Adult day program	Programa de cuidado diario para los adultos	Programa diürn per a adults
Advance Medical Directive	Directiva Médica Anticipada	Directiva Mèdica Anticipada
Affective release	Liberación afectiva	Alliberació afectiva
Afferent pupillary defect	Defecto aferente pupilar	Defecte aferent pupilar
Alternative therapy and/or complementary	Terapia alternativa y/o complementaria	Terapia alternativa i/o complementària
Ankle-foot orthosis AFO (abbr.)	Ortesis para el tobillo y el pie	Orteisis per al turmell i el peu
Antibody	Anticuerpo	Anticos
Anticholinergic	Anticolinérgico	Anticolinèrgic
Antigen	Antígeno	Antígen
Aspiration	Aspiración	Aspiració
Aspiration pneumonia	Pulmonía por aspiración	Pulmonia per aspiració
Assisted living	Vivir con asistencia	Viure amb assistència
Assistive devices	Aparatos de asistencia	Aparells d'assistència
Assistive technology	Tecnología asistencial	Tecnologia assistencial
Ataxia	Ataxia	Ataxia
Ataxic gait	Marcha atáxica	Marxa atàxica
Ataxic stance	Parada atáxica	Parada atàxica
Atrophy	Atrofia	Atrofia
Automimmune disease	Enfermedad autoinmune	Malaltia autoimmune
Autonomic nervous system	Sistema nervioso autónomo	Sistema nerviós autònom
Axon	Axón	Axó
Axonal damage	Daño axonal	Dany axonal
B cell	Célula B	Cèl·lula B
Babinski reflex	Reflejo de Babinski	Reflex de Babinski
Baclofen pump	Bomba de Baclofeno	Bomba de Baclofen
Balance	Balance	Balanç
Bell’s palsy	Parálisis de Bell	Paràlisi de Bell
Bio-feedback	Retroalimentación biológica	Retroalimentació biològica
Bladder	Vejiga	Bufeta
Blinding	Evaluación a ciegas	Avaluació a cegues
Blood-brain barrier	Barrera hemato-encefálica	Barrera hematoencefàlica
Brain	Cerebro	Cervell
Brain ventricle	Ventrículo cerebral	Ventricle cerebral
Brainstem Auditory Evoked Potential BAEP (abbr.)	Potenciales Evocados Auditivos. PEA (abrev.)	Potencials Evocats Auditius. PEA (abrev.)
Caregiver	Cuidador o Persona que cuida	Cuidador o persona que cuida
Catheter, urinary	Catéter urinario o Sonda urinaria	Catèter uriniari o sonda urinària
Central nervous system CNS (abbr.)	Sistema nervioso central SNC (abrev.)	Sistema nerviós central SNC (abrev.)
Cerebellum	Cerebelo	Cerebel
Cerebral	Cerebral	Cerebral
Cerebral ventricle	Ventrículo cerebral	Ventricle cerebral
Cerebrospinal fluid CSF (abbr.)	Líquido cefalorraquídeo LCR (abrev.)	Líquid cefaloraquidi LCR (abrev.)
Cerebrum	Cerebro	Cervell
Chronic	Crónico	Crònic
Chronic progressive	Crónico progresivo	Crònic progressiu
Clinical Advisory Committee	Comité Clínico de Consulta	Comité Clínic de Consulta
Clinical finding	Hallazgos clínicos	Troballes clíniques
Clinical trial	Estudio clínico o Ensayo clínico	Estudi clínic o Assaig clínic
Clinically Isolated Syndrome CIS (abbr.)	Síndrome clínicamente aislado	Síndrome clínicamente aïllat
Clonus	Clonus	Clonus
CNS	Sistema Nervioso Central SNC (abrev.)	Sistema Nerviós Central SNC (abrev.)
Cognition	Conocimiento o Cognición	Coneixement o Cognició
Cognitive impairment	Limitación cognitiva	Limitació cognitiva
Cognitive rehabilitation	Rehabilitación cognitiva	Rehabilitació cognitiva
Combined bladder dysfunction	Disfunción neurogénica combinada de la vejiga urinaria	Disfunció neurogènica combinada de la bufeta urinària
Comprehensive care	Cuidado completo	Cura completa
Computerized axial tomography CAT scan (abbr.)	Tomografía axial computarizada. TAC (abrev.)	Tomografia axial computeritzada. TAC (abrev.)
Condom catheter	Catéter de condón	Catèter de condó
Constipation	Estreñimiento	Restrenyiment
Contraction	Contracción	Contracció
Contracture	Contractura	Contractura
Controlled study	Estudio controlado	Estudi controlat
Coordination	Coordinación	Coordinació
Corpus Callosum	Cuerpo calloso	Cos Callós
Cortex	Corteza cerebral	Escorça Cerebral
Corticosteroids	Corticosteroides	Corticosteroides
Cortisone	Cortisona	Cortisona
Cranial nerves	Nervios craneales	Nervis craneals
CSF	Líquido cefalorraquídeo LCR (abrev.)	Líquid cefalorraquidi LCR (abrev.)
Cystoscopy	Cistoscopia	Citoscòpia
Cystostomy	Cistotomía	Cistotomia
Cytokines	Citoquinas	Citoquines
Damage to the nervous system	Daño al sistema nervioso	Dany al sistema nerviós
Decubitus ulcer	Ulcera de decúbito o Ulcera de presión	Úlcera de decúbit o Úlcera de pressió
Deep tendon reflexes	Reflejos de los tendones profundos	Reflexos dels tendons profunds
Dementia	Demencia	Demència
Demyelination	Desmielinización	Desmielinització
Dendrites	Dendritas	Dendrites
Depression	Depresión	Depressió
Detrusor-external sphincter dyssynergia	Disinergia del esfínter detrusor externo	Desinergia del esfínter detrusor extern
Diagnosis	Diagnóstico	Diagnòstic
Diplopia	Diplopía	Diplòpia
Disability	Discapacidad	Discapacitat
Disclaimer	Descargo de responsabilidad	Descàrrega de responsabilitat
disease	inmulógicamente	Immulògicament
Disease modifying agent DMA (abbr.)	Agentes modificadores de la enfermedad	Agents modificadors de la malaltia
Disease-modifying drugs DMD (abbr.)	Fármacos modificadores de la enfermedad	Fàrmacs modificadors de la malaltia
Disease-modifying therapy DMT (abbr.)	Terapias modificadoras de la enfermedad	Teràpies modificadores de la malaltia
Dizigotic twins	Gemelos dicigotos	Bessons dizigots
DNA	ADN	ADN
Doctor	Doctor (m) Doctora (f)* pnfemd	Doctor (m) Doctora (f)*pnfemd
Double-blind clinical study	Estudio clínico o doble-ciego	Estudi Clínic o doble cec
Drug (meaning illegal, not medicinal)	Drogas	Drogues
Durable Power of Attorney DPOA (abbr.)	Poder Legal	Poder legal
Dysarthria	Disartria	Disàrtria
Dysesthesia	Disestesia	Disestèsia
Dysmetria	Dismetría	Dismetria
Dysphagia	Disfagia	Disfàgia
Dysphonia	Disfonía	Disfonia
Electro- encephalography EEG (abbr.)	Electro- encefalografía EEG (abrev.)	Electro-encefalografia EEG (abrev.)
Electromyography EMG (abbr.)	Electromiografía EMG (abrev.)	Electromiografia EMG (abrev.)
Employment	Empleo	Treball
Endocrine system	Sistema endocrino	Sistema endocrí
English / Inglés	Spanish / Español	Catalan/Català
Epidemiology	Epidemiología	Epidemiologia
Erectil dysfunction ED (abbr.)	Disfunción eréctil	Disfunció erèctil
Etiology	Etiología	Etiologia
Euphoria	Euforia	Eufòria
Evoked potentials	Potenciales Evocados	Potencials Evocats
Exacerbation	Exacerbación o Recaída o Brote	Exacerbació o Recaiguda o Brot
Expanded disability status scale EDSS (abbr.)	Escala extendida del estado de discapacidad	Escala estesa de l'estat de discapacitat
Experimental allergic encephalomyelitis EAE (abbr.)	Encefalomielitis alérgica experimental	Encefalomielitis al·lèrgica experimental
Extensor spasm	Espasmo en extensión	Espasme en extenció
Failure to empty (bladder)	Falla (dificultad) en el vaciado de la vejiga.	Falla (dificultat) en el buidatge de la bufeta
Failure to store (bladder)	Falla (dificultad) de retencion de la orina en la vejiga	Falla (dificultat) de retenció de la orina a la bufeta
Fatigue	Cansancio o Fatiga* o Agotamiento * warning: “fatiga" for some individuals means asthma and to others nausea	Cansament o fatiga o Esgotament *warning "fatiga" per alguns individus significa asma i per d'altres nàusees
Female	Femenino	Femení
Finger to nose test	Prueba dedo nariz	Prova dit nas
Flaccid	Flacidez	Flacidesa
Flexor spasm	Espasmo en flexión	Espasme en flexió
Foley catheter	Sonda Foley	Sonda Foley
Food and Drug Administration FDA (abbr.)	Departamento de Fármacos y Alimentos de los US	Departament de farmacs i medicaments dels US
Foot drop	Pie caído	Peu caigut
Fraternal twins	Gemelos fraternales	Bessons fraternals
Frontal lobes	Lóbulos frontales	Lòbuls frontals
Gadolinium	Gadolinio	Gadolini
Gadolinium enhancing lesion	Lesión aumentada por contraste	Lesió augmentada per contrast
Gait	Marcha o Manera de caminar	Marxa o manera de caminar
Gastrocolic reflex	Reflejo gastrocólico	Reflex gastrocòlic
Gastroscopy	Gastroscopía	Gastroscòpia
Gastrostomy	Gastrostomía	Gastronomia
Gene	Gen	Gen
Glucocorticoid hormones	Hormonas glucocorticoides	Hormones glucocorticoides
Handicap	Desventaja	Desavantatge
Healthcare provider	Profesionales de la salud o Proveedores de servicios de salud	Professionals de la salut o proveïdors de serveis de salut
Healthcare Proxy	Apoderado o Representante por poder	Apoderat o representant per poder
Heel-knee-shin test	Prueba talón- rodilla	Prova taló- genoll
Helper T-lymphocytes	Linfocitos T inductores o ayudantes	Lmnfòcits T inductors o ajudants
Hemiparesis	Hemiparesia	Hemiparèsia
Hemiplegia	Hemiplejía	Hemiplegia
Home care	Cuidado en el hogar	Cura a la llar
Human genome	Genoma humano	Genoma humà
Hyperbaric oxygen	Oxígeno hiperbárico	Oxigen hiperbaric
I & R (abbr.) (Information and referral)	Informar y Referir	informar i referir
Identical Twins	Gemelos idénticos	Bessons idèntics
Immune system	Sistema inmunológico	Sistema immunològic
Immune-mediated	Enfermedad mediada	Malaltia mediada
Immunocompetent cells	Células inmunocompetentes	Cèl·lules immunocompetents
Immunoglobulin	Inmunoglobulina	Immunoglobulina
Immunology	Inmunología	Immunologia
Immuno-suppression	Inmunosupresión	Immunosupressió
Impairment	Impedimento o Incapacidad	Impediment o incapacitat
Incidence	Incidencia	Incidència
Incontinence	Incontinencia	Incontinència
Indwelling catheter	Catéter vesical permanente	Catèter vesical permanent
Inflammation	Inflamación	Inflamació
Information and Referral I & R (abbr.)	Informar y Referir	informar i referir
Innervation	Inervación	Innervació
Intention tremor	Temblor de intención	Tremolor d'intenció
Interferon	Interferón IFN (abrev.)	Interferó IFN (abrev.)
Interferon beta	Interferón beta	Interferó beta
Interferon gamma	Interferón gama	Interferó gamma
Intermittent selfcatheterization	Cateterización intermitente realizada por uno mismo(a)	Cateterització intermitent realitzada per un(a) mateix(a)
Internuclear opthalmoplegia	Oftalmoplejia intranuclear	Oftalmoplegia intranuclear
Intimacy	Intimidad	Intimitat
Intrathecal space	Espacio intratecal	Espai intratecal
Intravenous	Intravenoso	Intravenós
Lesion	Lesión	Lesió
Lhermitte’s sign	Signo de Lhermitte	Signe de Lhermitte
Libido	Libido	Libido
Living Will	Voluntad médica	Voluntat mèdica
Lofstrand crutch	Muleta de Lofstrand	Crossa deLofstrand
Lumbar puncture	Punción lumbar	Punció lumbar
Lumbar region	Región lumbar	Regió lumbar
Lymphocyte	Linfocito	Limfòcit
Macrophage	Macrófago	Macròfag
Magnetic resonance imaging MRI (abbr.)	Imagen de resonancia magnética RM (abrev.)	Imatge de Ressonància Magnètica RM(abrev.)
Medical Advisory Board	Junta Asesora Médica	Junta Assessora Mèdica
Medical history	Historia clínica	Història Clínica
Minimal Record of Disability MRD (abbr.)	Récord mínimo de discapacidad	Rècord mínim de discapacitat
Mixed incontinence	Incontinencia mixta	Incontinència mixta
Monoclonal antibodies	Anticuerpos monoclonales	Anticossos monoclonals
Monozygotic twins	Gemelos monocigotos	Bessons monozigots
Motor neurons	Neuronas motoras	Neurones motores
MRI (Magnetic Resonance Imaging)	RM (Imagen de resonancia magnética)	RM (Imatge de Ressonància Magnètica)
MS (Multiple Sclerosis)	EM (Esclerosis Múltiple)	EM (Esclerosi Múltiple)
Multiple Sclerosis functional composite MSFC (abbr.)	Compuesto funcional de esclerosis múltiple	Compost funcional d'esclerosi múltiple
Multiple sclerosis MS (abbr.)	Esclerosis múltiple EM (abrev.)	Esclerosi Múltiple EM (abrev.)
Muscle tone	Tono muscular	To muscular
Myelin	Mielina	Mielina
Myelin basic protein	Proteína básica de la mielina	Proteïna bàsica de la mielina
Myelitis	Mielitis	Mielitis
Myelogram	Mielograma	Mielograma
Nerve	Nervio	Nervi
Nervous system	Sistema nervioso	Sistema nerviós
Neuroendocrine	Neuroendocrino	Neuroendocrí
Neurogenic bladder	Vejiga neurogénica	Bufeta neurogènica
Neurologist	Neurólogo (m) Neuróloga (f)	Neuròleg (m) Neuròloga (f)
Neuron	Neurona	Neurona
Neuropsychologist	Neuropsicólogo (m) Neuropsicóloga (f)	Neuropsicòleg (m) Neuropsicològa (f)
Newly-diagnosed	Recién diagnosticado(a)	Diagnosticat(da) recentment
Nocturia	Nicturia	Nicturia
Nurse	Enfermero (m) Enfermera (f)	Infermer (m) Infermera (f)
Nursing home	Residencia para ancianos o Asilo de ancianos * See note	Llar per avis
Nystagmus	Nistagmo	Nistagme
Occupational therapist OT (abbr.)	Terapeuta ocupacional	Terapeuta ocipacional
Oligoclonal bands	Bandas oligoclonales	Bandes oligoclonals
Oligodendrocyte	Oligodendrocito	Oligodendròcit
Olmstead decision	Dictamen de Olmstead	Dictamen d'Olmstead
Open-label study	Estudio abierto	Estudi obert
Ophthalmoscope	Oftalmoscopio	Oftalmoscopi
Optic atrophy	Atrofia óptica	Atrófia òptica
Optic disc	Disco óptico	Disc òptic
Optic neuritis	Neuritis óptica	Neuritis òptica
Orthosis or Orthotic	Ortesis	Ortesi
Orthotist	Ortopeda	Ortopeda
Oscillopsia	Oscilopsia	Osciòpsia
Osteoporosis	Osteoporosis	Osteoporosi
Overactive bladder	Vegija hiperactiva	Bufeta hiperactiva
Overflow incontinence	Incontinencia por rebosamiento o Incontinencia por goteo	Incontinència per vessament o incontinència per degoteig
Paralysis	Parálisis	Paràlisi
Paraplegia	Paraplejía	Paraplegia
Paresis	Paresia	Parèsia
Paresthesia	Parestesia	Parestèsia
Paroxysmal spasm	Espasmo paroxístico	Espasme paroxístic
Paroxysmal symptoms	Síntomas paroxísticos	Símptomes paroxístics
Peer counselor	Consejero de condición similar	Conseller de condició similar
Percutaneous endoscopic gastrostomy PEG (abbr.)	Gastrostomía endoscópica percutánea	Gastrostòmia endoscòpica percutània
Percutaneous rhizotomy	Rizotomía percutánea	Rizotomia
Peripheral Nervous System PNS (abbr.)	Sistema nervioso periférico SNP (abrev.)	Sistema nerviós perifèric SNP (abrev.)
Periventricular region	Región periventricular	Regió periventricular
Physiatrist	Fisiatra	Fisiatra
Physical therapist PT (abbr.)	Terapeuta físico, o Fisioterapeuta	Terapeuta físic o Fisioterapeuta
Physician’s assistant PA (abbr.)	Doctor asistente (m) Doctora asistente (f) * See Note	Doctor assistent (m) Doctora assistent (f) * See Note
Pilot study	Estudio piloto	Estudi pilot
Placebo	Placebo	Placebo
Placebo effect	Efecto placebo	Efecte placebo
Plantar reflex	Reflejo plantar	Reflex plantar
Plaque	Placa	Placa
Plasma cell	Célula plasmática	Cèl·lula plasmàtica
Plasma Exchange or Plasmapheresis	Intercambio plasmático o Plasmaferesis	Intercanvi plasmàtic o Plasmaferesi
PNS	Sistema Nervioso Periférico SNP (abrev.)	Sistema nerviós perifèric SNP (abrev.)
Position sense	Sentido de posición o Sensibilidad postural	Sentit de posició o Sensibilitat postural
Postural tremor	Temblor postural	Tremolor postural
Post-void residual test PVR (abbr.)	Evaluación del residuo post-miccional	Avaluació del residu postmiccional
Power grading	Escala para la evaluación de la fuerza muscular	Escala per l'avaluació de la força muscular
Prevalence	Prevalencia	Prevalença
Primary Progressive MS	Esclerosis múltiple primaria progresiva	Esclerosi Múltiple primària progressiva
Prognosis	Pronóstico	Pronòstic
Progressive-Relapsing MS	Esclerosis múltiple recurrente -progresiva	Esclerosi Múltiple recorrent-progressiva
Prospective memory	Memoria prospectiva	Memòria prospectiva
Pseudobulbar affect	Síndrome pseudobulbar	Síndrome
Pseudo-exacerbation	Pseudo-exacerbación	Pseudo-exacerbació
Pyramidal tracts	Vía piramidal	Via piramidal
Pyuria	Piuria	Piuria
Quad cane	Bastón con cuatro patas	Bastó amb quatre potes
Quadriplegia	Cuadriplejía	Quatriplegia
Randomized study	Estudio aleatorio	Estudi aleatori
Recent memory	Memoria reciente o Memoria a corto plazo	Memòria recent o Memòria a curt termini
Recur	Repetir o Reaparecer	Repetir o Reaparèixer
Referral	Referir	Referir
Reflex	Reflejo	Reflex
Rehabilitation	Rehabilitación	Rehabilitació
Relapsing-remitting MS	Esclerosis múltiple remitente-recurrente	Esclerosi Múltiple remitent-recorrent
Remission	Remisión	Remissió
Remote memory	Memoria remota	Memòria remota
Remyelination	Remielinización	Remielinització
Research	Investigación	Investigació
Residual urine	Orina residual	Orina residual
Resting or Static tremor	Temblor en reposo	Tremolor en repòs
Retrobulbar neuritis	Neuritis retrobulbar	Neuritis retrobulbar
Romberg’s sign	Signo de Romberg	Signe de Romberg
Sacrum	Sacro	Sacre
Scanning speech	Habla escandida	Parla escandida
Sclerosis	Esclerosis	Esclerosi
Scotoma	Escotoma	Escotoma
Secondary progressive MS	Esclerosis múltiple secundaria progresiva	Esclerosi Múltiple secundària progressiva
Self-help groups	Grupos de ayuda propia	Grups d'auto-ajuda
Sensory	Sensorial o Sensitivo	Sensorial o Sensitiu
Sepsis	Septicemia	Septicèmia
Sign	Signo	Signe
Somatosensory evoked potencial SEP (abbr.)	Potencial evocado somatoestésico o Potencial evocado somatosensorial. PES (abrev.)	Potencial Evocat somatoestèsic o Potencial Evocat somatosensorial. PES (abrev.)
Spasticity	Espasticidad	Espasticitat
Speech/language pathologist	Logopeda o Patólogo (m) del lenguaje o del habla Patóloga (f) del lenguaje o del habla	Logopeda o Patòleg (m) del llenguatge o de la parla Patòloga (f) del llenguatge o de la parla
Sphincter	Esfínter	Esfínter
Sphyncterotomy	Esfinterotomía	Esfinterotomia
Spinal cord	Médula espinal	Medul.la espinal
Spinal tap	Punción lumbar	Punció lumbar
Spirometer	Espirómetro	Espiròmetre
Spontaneous voiding	Micción espontánea	Micció espontània
Stance ataxia	Ataxia proprioceptiva o Ataxia sensorial	Ataxia proprioceptiva o Ataxia sensorial
Stem cell	Célula madre	Cèl·lula mare
Steroids	Esteroides * See Note	Esteroides
Straight catheter	Sonda recta	Sonda recta
Stress incontinence	Incontinencia de esfuerzo o Incontinencia de estrés	Incontinència d'esforç o Incontinència d'estrès
Stretch	Estirarse	Estirar-se
Subarachnoid space	Espacio subaracnoideo	Espai subaracnoide
Support group	Grupo de apoyo	Grup de recolzament
Suppressor T-lymphocytes	Linfocitos-T supresores	Limfòcits-T supressors
Swallow	Tragar	Empassar
Symptom	Síntoma	Símptoma
Tandem gait	Marcha en tándem	Marxa en tàndem
T-cell	Célula T	Cèl·lula T
Tenotomy	Tenotomía	Tenotomia
Thoracic spine	Columna torácica	Columna toràcica
Tissue	Tejido	Teixit
Titubation	Titubeo	Titubeig
Tonic seizure	Crisis tónica o Ataques tónicos	Crisi tònica o Atacs tònics
Transcutaneous electric nerve stimulation	Estimulación eléctrica nerviosa transcutánea	Estimulació elèctrica nerviosa transcutània
Transurethral resection	Resección transuretral	Resecció transuretral
Transverse Myelitis	Mielitis transversa	Mielitis transversa
Tremor	Temblor	Tremolor
Trigeminal neuralgia	Neuralgia del trigémino	Neuràlgia del trigèmin
Twins, fraternal	Gemelos fraternales	Bessons fraternals
Twins, identical	Gemelos monocigotos	Bessons monozigots
Urethra	Uretra	Uretra
Urge incontinence	Incontinencia de urgencia	Incontinència d'urgència
Urinalysis	Examen de orina	Examen d'orina
Urinary frequency	Frecuencia urinaria	Freqüència urinària
Urinary hesitancy	Vacilación urinaria	Vacil·lació urinària
Urinary incontinence	Incontinencia urinaria	Incontinència urinària
Urinary sphincter	Esfínter urinario	Esfínter urinari
Urinary urgency	Urgencia urinaria	Urgència urinària
Urine culture and sensitivity C&S (abbr.)	Cultivo de orina y sensibilidad	Cultiu d'orina i sensibilitat
Urologist	Urólogo (m) Uróloga (f)	Uròleg (m) Uròloga (f)
Urology	Urología	Urologia
Vertigo	Vértigo	Vertigen
Vibration sense	Sensibilidad a la vibración	Sensibilitat a la vibració
Videofluroscopy	Videofluoroscopía	Vídeofluoroscòpia
Visual acuity	Agudeza visual	Agudesa visual
Visual evoked potential VEP (abbr.)	Potenciales evocados visuales PEV (abrev.)	Potencials Evocats Visuals PEV (abrev.)
Vocational rehabilitation	Rehabilitación vocacional	Rehabilitació vocacional
Void	Micción	Micció
White matter	Substancia blanca o Materia blanca	Substància blanca o Matèria blanca
Worsen	Empeorar	Empitjorar
