# Supplementary material for: Knowledge Retrieval from PubMed Abstracts and Electronic Medical Records with the Multiple Sclerosis Ontology
Source: PLoS One. 2015 Feb 9;10(2):e0116718. doi: 10.1371/journal.pone.0116718 (PMC4321837; doi:10.1371/journal.pone.0116718)
Supplement: S4 Table — (XLS) [file pone.0116718.s005.xls]

## Sheet: comorbidites MS by MSO
Cases	Diagnosis (MESH code)
323	Pain(D010146@MESH)
164	Wounds and Injuries(D014947@MESH)
133	Diplopia(D004172@MESH)
132	Neuritis(D009443@MESH)
99	Edema(D004487@MESH)
59	Anxiety(C000009@COM)
44	Vertigo(D014717@MESH)
41	Viral(C000120@COM)
38	Diabetes(C000033@COM)
37	Sleep Initiation and Maintenance Disorders(D007319@MESH)
31	Arthritis(D001168@MESH)
27	Hernia(D006547@MESH)
27	Multiple Endocrine Neoplasia Type 2b(D018814@MESH)
26	Ataxia(D001259@MESH)
22	Abdominal Pain(D015746@M
20	Hypothyroidism(D007037@MESH)
18	Diarrhea(D003967@MESH)
16	Nevus(D009506@MESH)
16	Hematoma(D006406@MESH)
16	Hypercholesterolemia(D006937@MESH)
14	Neuralgia(D009437@MESH)
14	No Interferon_Beta_1b
13	Nocturia(D053158@MESH)
13	Anisocoria(D015875@MESH)
13	Bone Diseases Metabolic(D001851@MESH)
12	Thyroid(C000112@COM)
12	Asthma(D001249@MESH)
12	Fibromyalgia(D005356@MESH)
11	Epilepsy(D004827@MESH)
10	Cardiovascular(C000019@COM)
9	Gastroenteritis(D005759@MESH)
9	Neck Pain(D019547@MESH)
9	Hemianopsia(D006423@MESH)
9	Vasculitis(D014657@MESH)
8	Tendinopathy(D052256@MESH)
8	Anorexia(D000855@MESH)
8	Anhedonia(D059445@MESH)
7	Urticaria(D014581@MESH)
7	Contusions(D003288@MESH)
7	Varicose Veins(D014648@MESH)
6	Candidiasis(D002177@MESH)
6	Dilatation Pathologic(D004108@MESH)
6	Hernia Inguinal(D006552@MESH)
6	Proteinuria(D011507@MESH)
6	Apnea(D001049@MESH)
6	Adenoma(D000236@MESH)
6	Obesity(D009765@MESH)
6	Stroke(D020521@MESH)
6	Acne Vulgaris(D000152@MESH)
6	Meningioma(D008579@MESH)
6	Sepsis(D018805@MESH)
6	Acquired Immunodeficiency Syndrome(D000163@MESH)
6	Otitis(D010031@MESH)
6	Fistula(D005402@MESH)
5	Meningitis(D008581@MESH)
5	Hematuria(D006417@MESH)
5	Dermatitis(D003872@MESH)
5	Facies(D019066@MESH)
5	Optic Neuritis(D009902@MESH)
5	Gastritis(D005756@MESH)
5	Granuloma(D006099@MESH)
5	Necrosis(D009336@MESH)
5	Blister(D001768@MESH)
5	Hemangioma(D006391@MESH)
5	Lentigo(D007911@MESH)
4	Pancreatitis(D010195@MESH)
4	Carcinoma(D002277@MESH)
4	Herpes Zoster(D006562@MESH)
4	Hallux Valgus(D006215@MESH)
4	Lordosis(D008141@MESH)
4	Dementia(C000031@COM)
4	Alopecia(D000505@MESH)
4	No Vertigo No Viral(C000120@COM)
3	Peritonitis(D010538@MESH)
3	Diabetes Mellitus Type 1(D003922@MESH)
3	Prolactinoma(D015175@MESH)
3	Coma(D003128@MESH)
3	Exanthema(D005076@MESH)
3	Adenocarcinoma(D000230@MESH)
3	Autoimmune disease(C000014@COM)
3	Exotropia(D005099@MESH)
3	Fibroadenoma(D018226@MESH)
3	Heartburn(D006356@MESH)
3	Malaria(D008288@MESH)
3	Pericarditis(D010493@MESH)
3	Apraxias(D001072@MESH)
3	Neoplasm Metastasis(D009362@MESH)
3	Purpura(D011693@MESH)
3	Suppuration(D013492@MESH)
3	Sarcoidosis(D012507@MESH)
3	Prostatitis(D011472@MESH)
3	Confusion(D003221@MESH)
3	Ectromelia(D004480@MESH)
3	Psoriasis(D011565@MESH)
3	Xerostomia(D014987@MESH)
3	No Anxiety(C000009@COM)
3	No Anhedonia(D059445@ME
2	Fibrosis(D005355@MESH)
2	Angioedema(D000799@MESH)
2	Anuria(D001002@MESH)
2	Earache(D004433@MESH)
2	Eclampsia(D004461@MESH)
2	Exostoses(D005096@MESH)
2	Mastitis(D008413@MESH)
2	Melena(D008551@MESH)
2	Miosis(D015877@MESH)
2	Necrobiosis Lipoidica(D009335@MESH)
2	Skin Diseases(D012871@MESH)
2	Paraplegia(D010264@MESH)
2	Sclerosis(D012598@MESH)
2	Sinusitis(D012852@MESH)
2	Telangiectasis(D013684@MESH)
2	Corneal Edema(D015715@MESH)
2	Glioma(D005910@MESH)
2	Psychotic Disorders(D011618@MESH)
2	Alopecia Areata(D000506@MESH)
2	Endometriosis(D004715@MESH)
2	Hamartoma(D006222@MESH)
2	Candidiasis Oral(D002180@MESH)
2	Bacteriuria(D001437@MESH)
2	Melanoma(D008545@MESH)
2	No Nocturia(D053158@MESH)
2	No Apraxias(D001072@MESH)
1	Gliosis(D005911@MESH)
1	Hemobilia(D006431@MESH)
1	Hemoglobinuria(D006456@MESH)
1	Hepatitis A(D006506@MESH)
1	Hepatitis Autoimmune(D019693@MESH)
1	Hepatitis C(D006526@MESH)
1	Hernia Hiatal(D006551@MESH)
1	Hernia Umbilical(D006554@MESH)
1	Hidradenitis(D016575@MESH)
1	Lice Infestations(D010373@MESH)
1	Listeriosis(D008088@MESH)
1	Low Back Pain(D017116@MESH)
1	Metatarsalgia(D037061@MESH)
1	Nausea(D009325@MESH)
1	Necrobiotic Disorders(D017441@MESH)
1	Neoplasms(C000078@COM)
1	Neurologic Manifestations(D009461@MESH)
1	Olfaction Disorders(D000857@MESH)
1	Osteonecrosis(D010020@MESH)
1	Otosclerosis(D010040@MESH)
1	Parkinson Disease(D010300@MESH)
1	Parkinsonian Disorders(D020734@MESH)
1	Phobic Disorders(D010698@MESH)
1	Pica(D010842@MESH)
1	Pinguecula(D059407@MESH)
1	Pleurisy(D010998@MESH)
1	Pneumonia(D011014@MESH)
1	Refractive Errors(D012030@MESH)
1	Serositis(D012700@MESH)
1	Shock Septic(D012772@MESH)
1	Trigeminal Neuralgia(D014277@MESH)
1	Varicocele(D014646@MESH)
1	Vestibular Neuronitis(D020338@MESH)
1	Vision Disorders(D014786@MESH)
1	Vomiting(D014839@MESH)
1	Amnesia(D000647@MESH)
1	Anomia(D000849@MESH)
1	Dengue(D003715@MESH)
1	Histiocytoma Benign Fibrous(D018219@MESH)
1	Hypohidrosis(D007007@MESH)
1	Inappropriate ADH Syndrome(D007177@MESH)
1	Irritable Bowel Syndrome(D043183@MESH)
1	Neurofibromatoses(D017253@MESH)
1	Oliguria(D009846@MESH)
1	Otitis Media(D010033@MESH)
1	Pars Planitis(D015868@MESH)
1	Thrombocytopenia(D013921@MESH)
1	Tics(D020323@MESH)
1	Vitiligo(D014820@MESH)
1	Colitis(D003092@MESH)
1	Agnosia(D000377@MESH)
1	Tinnitus(D014012@MESH)
1	Akinetic Mutism(D000405@MESH)
1	Pinta(D010874@MESH)
1	Fasciitis(D005208@MESH)
1	Retinitis(D012173@MESH)
1	Panuveitis(D015864@MESH)
